# Supplementary material for: GATA-dependent regulatory switches establish atrioventricular canal specificity during heart development
Source: PubMed Central journal article supplement — Nat Commun. 2014 Apr 28;5:3680. doi: 10.1038/ncomms4680 (PMC4015328; doi:10.1038/ncomms4680), 2014-04-28
Supplement: ncomms4680-s1.pdf [file ncomms4680-s1.pdf]

**cGATA6 (-1420/-1319, 102 bp)**

GGGGTGGCGGCACAGAGTATTTGAAGGCGCTGGGATAAGGAGCGGAGGGACGCGCGGGCGGCACGTCGGCGCTCGGGGCGCTGCGTTATCGGCCCGG

**cGATA6(GATA)<sub>2</sub> (-1420/-1374, 47 bp)**

GGGGTGGCGGCACAGAGTATTTGAAGGCGCTGGGATAAGGAGC

**cGATA6muSP(GATA)<sub>2</sub> (47 bp)**

GGCAAGCTTGCACAGAGTATTTGAAGGCGCTGGGATAAGCGCT

**TBX2 (-2700/-2300, 380 bp)**

GCTGAGCGCGCGTCCCCACCCGCTCTGCGGGTCCCGGCCGATGCGAAGTGACAGGGGCCGGAGCTTTGTTGTGGAGCCTCGGCCTGGCGCCAGGCCCGCTCG  
TCCGTGCCCTCCCCCTCCAGCCTCCGGCGAGGGCGCCCGCCGGGGCTCTTAAAGAGACACGCACACTCTGCCAGGGGACTCCCCAGCGGCGCTGT  
TCCTGGGAAGGGGAGATGAGTGGGGGTAGACCCAGCGGGGGTAGGGCGAAGCAGGAGTTGCGAGCCGCAAGGCGCCGCTCGAGAGGCTGCTTAGGCCCGCCAG  
CACAGTTTTTCGATGCTACAAGGATAATTCTAAGAAAATTTTGTGGGGATGGGTCGATAAAGAATCTTAAG

**GJD3 (-2900/-2300, 660 bp)**

GACCCCTGCCACTCACTTCCGGCCGAGCTGCCGCTCTGACCCTGTCTCTCAGCTATGGAGGCTCAGGGTCACATCTCTTCTTTCTAACTACCCAGGAATGGTCC  
AGCCAGCCTCCCATTTGCTCCTGCTTTCGTAGGCTGGAAAAAGCCACCAGACCCACCCACCTGAGCCCACCCGACCCACCCAGTGTGACTCTGCAGGGAGT  
GGGATCGTGCCACAGAGATGCTAGGGTGGGGCAGCAGATGGAGAGCCACTGTACTCTGCCCTGTCCCCACCTAGCTCCCCATGCCAGAGGAGACTCTACAATC  
TCTAGGACCCAGTCTTAGATAAGCCGTGGGCAGCCGGGAGGTGTTGCTGACAATACCCAGAGCTGGTGGCATTTGGCCCTTCTTGGCCCTGCTTGAAGAAGTTCTG  
GGCTGAGAGGGTTCTTCTGTGTCCAGACACCTCAGTCTGCTGTGGAGCCATAGTCCCAGCATCAGTCACAGGTGGACATACACAGGGGCGTGGACGTGTTTATA  
TCTAATAAGTTTATAACAGTACCGTAATTGACACATGACAACATTTTGTAAAATGAAAGAAATAAGCAAAAACAAAACAGAAAAACAACAAAAAACCCAAAGGC  
CGAATGGAATCTCTCCAGCCTGCTCAGTA

**TNNI3 (-230/+126, 356 bp)**

GTCTAGACTCTTGGATTGAGAGAAGAGGGACCTTGCTCCGGGTTTTCTAAGTTTGGGGAGGAGGGAGCTGGGGCGCTAGAGTCAAAGGAGGAGGGCTGTAGA  
TCCTGGGCACCTTGGTTGACCCAACTGGAGCTTTGCACACGGCTCCCCACACCCCTGTATCGCTTATCCTGGGCAGGGGAGGAGACAGCAGTATATTTAGTCT  
TTGTCTCGCCCTTATCAGTGTCTCAGTGAGGCTTGGAGCCAGAGGAAACCCAACTCTAGAGACCTCAAGGTCACCAGGGACACCCCTCCAGGACC  
CTCCAGGAATCTCCGATCCTGTTCTCTGCCTCTGGAGATCA

**TNNT2 (-497/+192, 711 bp)**

CTGCAGAGCCATCTGCCAGAGGCCGCTTAGCCATAAGAAGCAGCCAACAGCCAGACAACATTTTAAACCCCGACTTCATTTCCAACGGAGTTCTAGCCCTCT  
CCTCCCAGGACCTGGCTCAGAGGCTCGTGAAGTGTCTCTGACGTTGACTACTTCTGCCCTCAGCTCTGCTCCAGCCTGCTCTTCTGGACCTGGGCTTCTGGCG  
TCTGCTTATCGGGATTCTCAAGAGGGACAGCTGGTTTATGTTACAAGCCTGTTCCCTGCAATCTGCTCTGGTTTTAAATAGCTTATCTGAGCAGCTGGAGGA  
CCACATGAGCTTATATGGCGTGGGGTACTTGTTCCTTTAGCCCTGTGCCGGGCACCTGTCAAATAGTAGCCAACACCCCCCCCATTGTGTTGTCCCCCCCCCA  
TCTCCTGCTGCACATTCCTCCCACCGTGGGGCTTGGCTCACAAGGCCCCAGCCACATGCTTGTAAAGCTCTCCCCATGCCCTGCCCTCAGCCAGTCCCTGCT  
GAGGCTGAGCAGACACCTCAAGTCTGAGTGCAGGTCCTGTTTCAAGGTAAGACAAGGGGAGGCTCTAGGAAGGGACAGAAGTCGGCGGGAGAACGAGAGATTT  
GGCCCTGACACCTTTCCCTAGCCGTGTGCTTGTGTCTACCCTGAGTGGTTGGGTACCAGGAAATCCAGGGCCCTTTCTAGA

1) GATA binding motifs identified by ChIP sequencing indicated in literature<sup>1-3</sup>

WGATAAC NGATN

2) SMAD binding motifs identified by ChIP sequencing indicated in literature<sup>4</sup>

CAGAGCCa CTTCTCTG TCTGCTCT GgGTGTGG GAGGtGGG GCGGGGc

SMAD consensus binding sites indicated in literature<sup>5-9</sup>

GTCTG GTCT GGCGCC GCCG GCAT CAGC CGCC

3) E-box binding motifs identified by ChIP sequencing indicated in literature<sup>10</sup>

CGCGTC CACGTG CACGCG

4) SP consensus binding element indicated in literature<sup>11,12</sup>

(G/T)GGGCGG(G/A)(G/A)(C/T)

GAGGGAGGAGGGAG

AAAGGAGGAGGGG

**Supplementary Figure 1:** Transcription binding sites in the cGata6, Tbx2, Cx30.2, cTnI and cTnT regulatory regions (GATA binding sites are depicted in green, SMAD in grey, E-box in blue and SP in red).

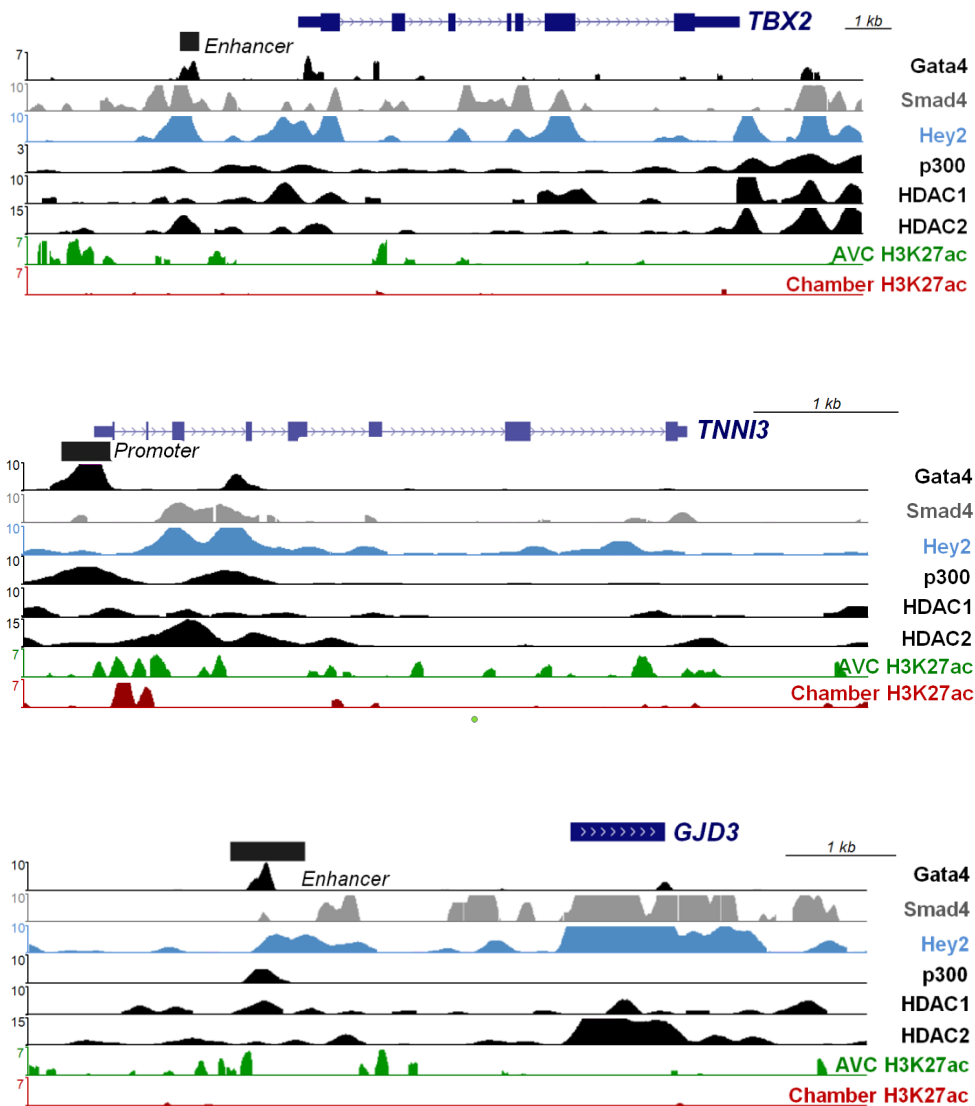

**Supplementary Figure 2:** UCSC genome browser views of ChIP-seq data for Tbx2, Gjd3 and cTnnI loci with ChIP-seq profiles of Gata4 (black) and p300 (black) in heart, Smad4 (grey), Hdac1, -2<sup>26</sup> (black) and Hey2 (blue) in mouse ESC. AV canal specific regions are depicted as a black box.

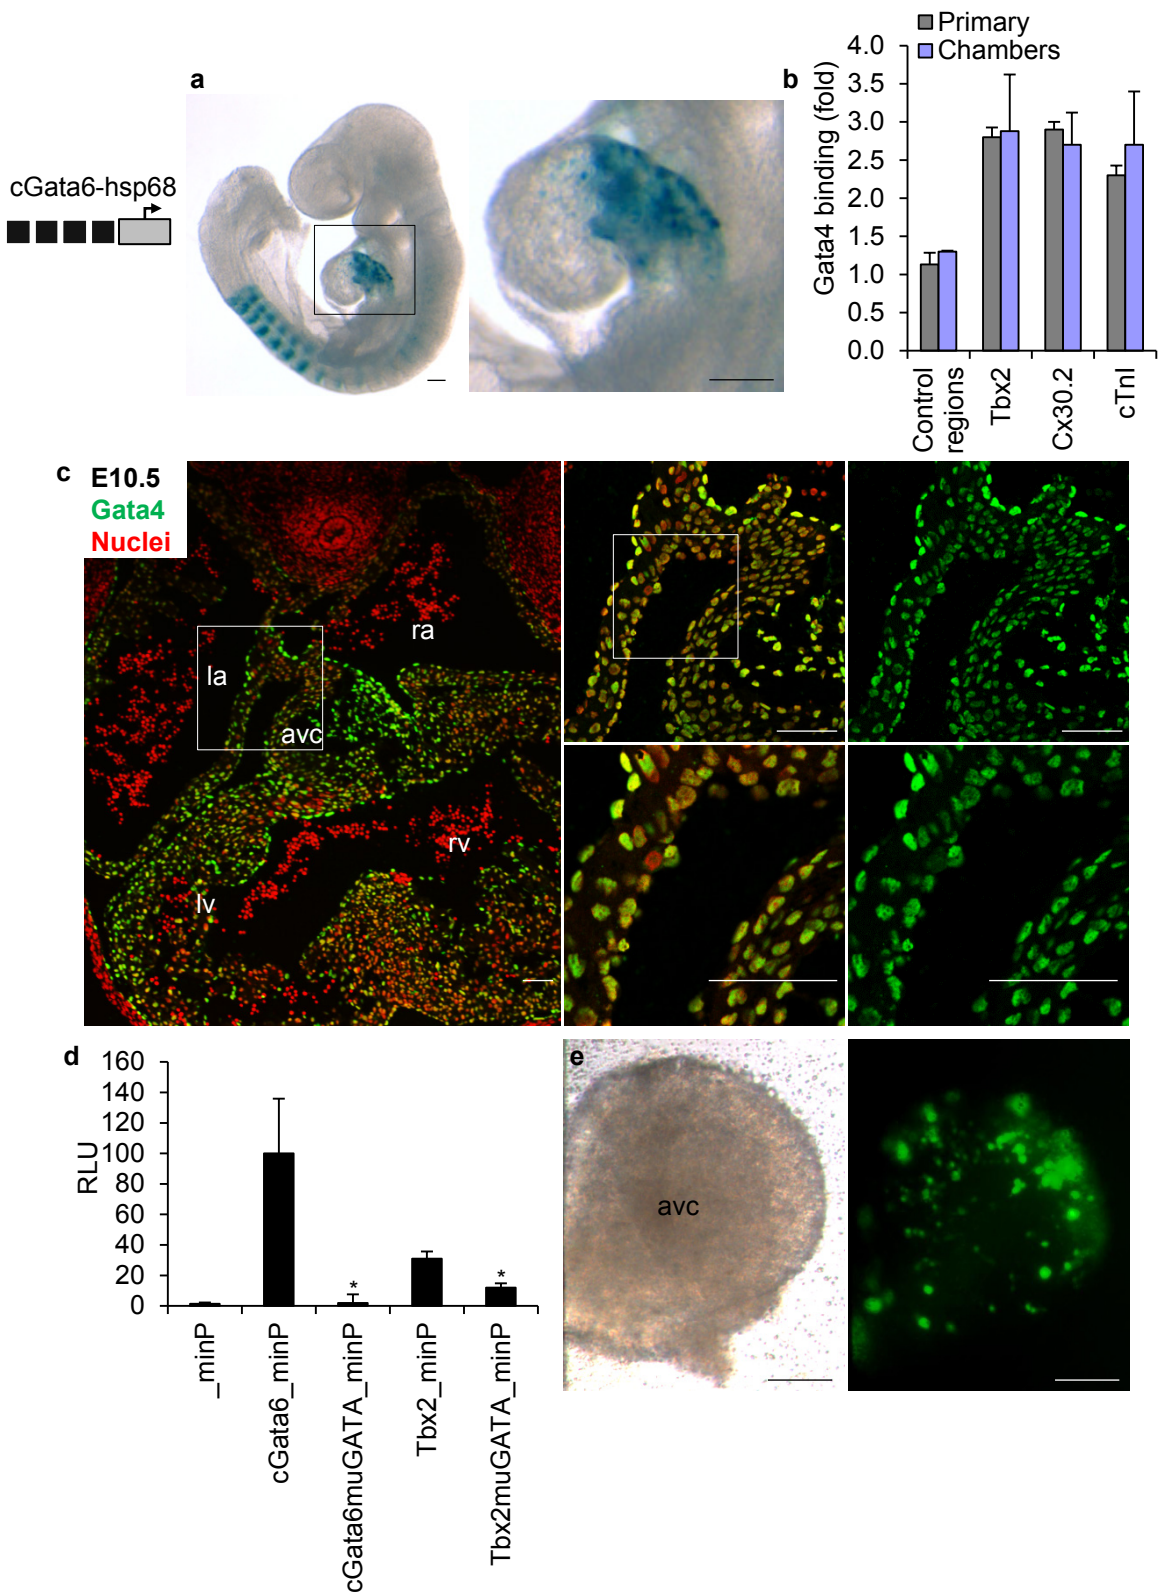

**Supplementary Figure 3:** (a) Tandemly repeated copies of a 102 bp cGata6 enhancer fragment drive expression in the developing AV canal at E9.5 (scale bars represent 100  $\mu$ m). (b) Gata4 ChIP-qPCR on E10.5 AV canal/outflow tract and chamber extracts shows enrichment for AV enhancers. (c) Immunohistochemistry for Gata4 protein on sections of E10.5 hearts (scale bars represent 25  $\mu$ m). (d) Activity of wt and GATA mutated cGata6 and Tbx2 enhancers in AV canal explants (Bars represent mean sem; n=4; \*p < 0.05 by Student's t-test) (e) AV canal explant transfected with a CMV-EGFP reporter (scale bars represent 25  $\mu$ m).

a

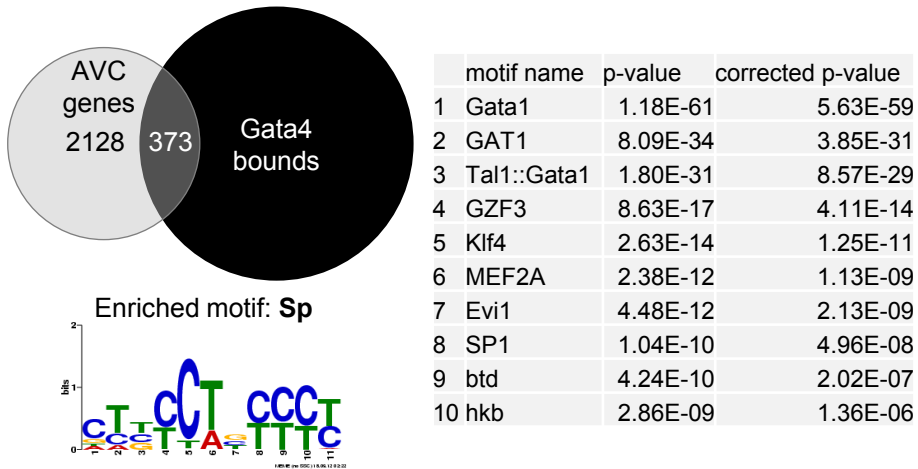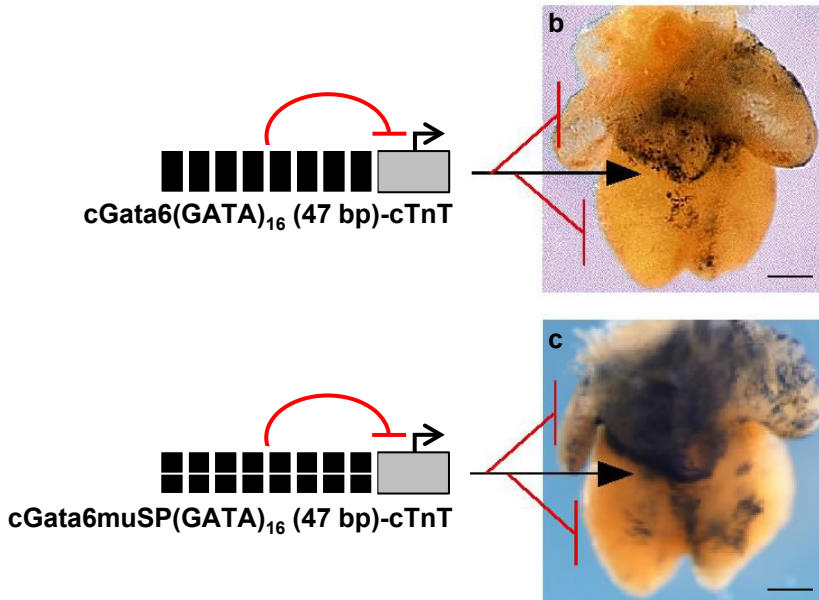

**Supplementary Figure 4:** (a) Sp binding motif is significantly enriched in Gata4- bound sites. To identify Gata4-cofactor networks operating proximally and distally through cis- and transacting elements with respect to the Gata4 occupancy, we crossed our Gata4 ChIP-seq<sup>18</sup> with the gene expression profiling of the AV canal<sup>19</sup> using Galaxy. We found that 373 peaks were present in or near AV canal genes (flanking regions of 50 kb on either side of the AV canal loci). We then searched for enrichments in co-occurring transcription factor binding site motifs within the 373 Gata4 ChIP-seq peaks. In line with this we now provide the top 10 motifs recovered by MEME in the set of 373 peaks, together with a screenshot of the STAMP match for SP1 from Jaspar. The scoring was conducted using the Fisher-exact test. (b) cTnT transgenic harbouring tandemly repeated copies of a 47 bp cGata6 show predominant expression in the AV canal myocardium, similar to the pattern of the cTnT transgenic in which only the GATA sites were preserved (c). Scale bars represent 100  $\mu$ m.

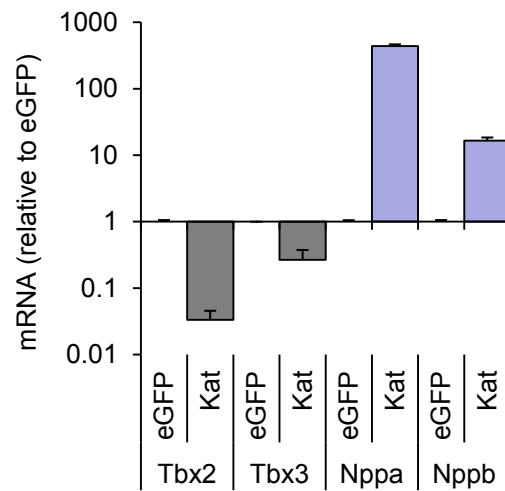

**Supplementary Figure 5:** mRNA isolated from AV canal-EGFP and chambers-Katushka sorted cells and expression of AV canal (*Tbx2*, *Tbx3*) and chamber markers (*Nppa*, *Nppb*) were analyzed with RT-qPCR. Data were normalized to *Hprt* and expressed as folds of increase over eGFP (mean  $\pm$  sd; n=3).

### **Established AV canal gene loci**

Bmp2<sup>13-15</sup>  
Cacna1g<sup>16</sup>  
Cacna2d2<sup>17</sup>  
Gjd3<sup>18</sup>  
Id1<sup>19</sup>  
Id2<sup>20,21</sup>  
Kcna6<sup>22</sup>  
Msx2<sup>23</sup>  
Robo1<sup>24</sup>  
Tbx2<sup>25</sup>  
Tbx3<sup>25</sup>

### **Established myocardial gene loci**

Actc1  
Atp2a2  
Des  
Gata4  
Gata6  
Mef2c  
Mybpc3  
Myh6  
Myh7  
Myl2  
Myl4  
Myl7  
Nkx2-5  
Pln  
Tbx20  
Tbx5  
Tnnc1  
Tnnt2  
Tpm1  
Zfpm2

### **Top-50 enriched AV canal gene loci**

5730559C18Rik

5930412G12Rik  
9030425E11Rik  
9030425E11Rik  
Abi3  
Afp  
Crlf1  
Crmp1  
Cthrc1  
Cyp26b1  
Dhh  
Dnm3os  
Ebf3  
Emid2  
Foxc2  
Gata3  
Gngt2  
Hapln1  
Hmgcs2  
Hoxa5  
Hs3st1  
Icam2  
Igf1  
Itih2  
Klk8  
Matn4  
Mfsd2  
Mmp2  
Msx1  
Olfml1  
Papss2  
Papss2  
Prdx2  
Ptrb  
Ramp2  
Sall3  
Serpina1b  
Serpina1d  
Serpinf1  
Serpinf2



Sox10  
Sox17  
Sox9  
Sp5  
Tgfb1  
Tgfb1  
Trpv4  
Tspan8  
Twist1  
Twist2

**Supplementary Table 1:** List of genes expressed specifically in AV canal or in all myocardium, and of the top-50 AV canal-enriched gene loci.

|                                                    | Number of AV canal H3K27ac peaks | Number of chamber H3K27ac peaks | Ratio of H3K27ac peaks AV canal / chamber | Significance (Z-test on difference) |
|----------------------------------------------------|----------------------------------|---------------------------------|-------------------------------------------|-------------------------------------|
| Random UCSC gene loci (50kb flanks)                | 12221                            | 11273                           | 1.08                                      | 0-hypothesis population             |
| Established myocardial gene loci (2kb flanks)      | 132                              | 183                             | 0.72                                      | $1.46 \times 10^{-3}$               |
| Established myocardial gene loci (50kb flanks)     | 268                              | 375                             | 0.71                                      | $2.15 \times 10^{-7}$               |
| Established AV canal gene loci (50kb flanks)       | 96                               | 62                              | 1.55                                      | $2.58 \times 10^{-2}$               |
| Top-50 AV canal-enriched gene loci (2kb flanks)    | 103                              | 55                              | 1.87                                      | $8.26 \times 10^{-4}$               |
| Top-50 AV canal-enriched gene loci (50kb flanks)   | 288                              | 187                             | 1.54                                      | $1.39 \times 10^{-4}$               |
| Putative enhancers of established myocardial genes | 245                              | 332                             | 0.74                                      | $5.70 \times 10^{-6}$               |
| Putative enhancers of established AV canal genes   | 92                               | 57                              | 1.61                                      | $1.61 \times 10^{-2}$               |
| Promoters of established myocardial genes          | 13                               | 27                              | 0.48                                      | $1.41 \times 10^{-2}$               |
| Promoters of top-50 AV canal-enriched genes        | 100                              | 51                              | 1.96                                      | $4.26 \times 10^{-4}$               |

**Supplementary Table 2:** Comparison of H3K27ac enrichment on AV canal gene loci in AV canal-cells or chamber cells. Values are expressed as number of peaks called from AV canal-derived and chamber-derived H3K27ac ChIP-Seq datasets, respectively. Random UCSC gene loci were selected by randomly picking 5541 genes from the total UCSC Gene list. Established myocardial gene loci were defined as 20 selected genes with a confirmed broad cardiac expression pattern. Established AV canal gene loci were 11 selected genes the expression of which has been experimentally confirmed to be limited to AV canal myocardium (see Supplemental Table S2 for the selected gene lists). Top-50 AV canal-enriched gene loci were selected by picking the 50 genes most significantly differentially expressed between AV canal and chambers as determined by micro-array data generated by Horsthuis et al. 2009<sup>22</sup>. All genes were extended upstream and downstream with 2kb or 50kb flanking regions to incorporate potential regulatory regions. To analyze promoter exclusive interactions, TSS coordinates were taken from all gene sets and extended 3kb upstream and 1 kb downstream. To assess H3K27ac distribution at putative enhancer regions, the genes were extended 50 kb upstream and 50 kb downstream, whereas the region spanning from -3 kb to + 1kb relative to the TSS was excluded. Peaks were considered overlapping with a gene locus or promoter if they have 1 bp or more in common.

**H3K27ac enriched regions occupied by Gata4 in AV canal**

| <b>Term</b>                                                                                             | <b>Count</b> | <b>%</b> | <b>P-value</b> |
|---------------------------------------------------------------------------------------------------------|--------------|----------|----------------|
| GO:0006793~phosphorus metabolic process                                                                 | 82           | 9        | 2.76E-09       |
| GO:0006796~phosphate metabolic process                                                                  | 82           | 9        | 2.76E-09       |
| GO:0010604~positive regulation of macromolecule metabolic process                                       | 60           | 7        | 5.25E-07       |
| GO:0006468~protein amino acid phosphorylation                                                           | 60           | 7        | 7.58E-07       |
| GO:0010628~positive regulation of gene expression                                                       | 49           | 5        | 1.41E-06       |
| GO:0045941~positive regulation of transcription                                                         | 48           | 5        | 1.55E-06       |
| GO:0016310~phosphorylation                                                                              | 64           | 7        | 1.71E-06       |
| GO:0031328~positive regulation of cellular biosynthetic process                                         | 53           | 6        | 1.87E-06       |
| GO:0045935~positive regulation of nucleobase, nucleoside, nucleotide and nucleic acid metabolic process | 50           | 6        | 2.15E-06       |
| GO:0007242~intracellular signaling cascade                                                              | 76           | 9        | 2.23E-06       |
| GO:0051173~positive regulation of nitrogen compound metabolic process                                   | 51           | 6        | 2.30E-06       |
| GO:0007167~enzyme linked receptor protein signaling pathway                                             | 33           | 4        | 2.31E-06       |
| GO:0009891~positive regulation of biosynthetic process                                                  | 53           | 6        | 2.46E-06       |
| GO:0045893~positive regulation of transcription, DNA-dependent                                          | 43           | 5        | 3.38E-06       |
| GO:0051056~regulation of small GTPase mediated signal transduction                                      | 29           | 3        | 4.01E-06       |
| GO:0051254~positive regulation of RNA metabolic process                                                 | 43           | 5        | 4.06E-06       |
| GO:0006357~regulation of transcription from RNA polymerase II promoter                                  | 56           | 6        | 4.87E-06       |
| GO:0010557~positive regulation of macromolecule biosynthetic process                                    | 50           | 6        | 6.30E-06       |
| GO:0007507~heart development                                                                            | 28           | 3        | 7.76E-06       |
| GO:0030029~actin filament-based process                                                                 | 24           | 3        | 1.04E-05       |
| GO:0045944~positive regulation of transcription from RNA polymerase II promoter                         | 37           | 4        | 1.86E-05       |
| GO:0030036~actin cytoskeleton organization                                                              | 22           | 2        | 3.73E-05       |
| GO:0007169~transmembrane receptor protein tyrosine kinase signaling pathway                             | 24           | 3        | 4.28E-05       |
| GO:0007155~cell adhesion                                                                                | 48           | 5        | 1.15E-04       |
| GO:0022610~biological adhesion                                                                          | 48           | 5        | 1.20E-04       |
| GO:0046578~regulation of Ras protein signal transduction                                                | 21           | 2        | 3.94E-04       |
| GO:0007010~cytoskeleton organization                                                                    | 31           | 3        | 4.31E-04       |
| GO:0035295~tube development                                                                             | 26           | 3        | 8.37E-04       |
| GO:0060416~response to growth hormone stimulus                                                          | 4            | 0        | 1.00E-03       |
| GO:0060396~growth hormone receptor signaling pathway                                                    | 4            | 0        | 1.00E-03       |
| GO:0044057~regulation of system process                                                                 | 21           | 2        | 1.48E-03       |

|                                                          |    |   |          |
|----------------------------------------------------------|----|---|----------|
| GO:0032870~cellular response to hormone stimulus         | 10 | 1 | 1.56E-03 |
| GO:0051270~regulation of cell motion                     | 14 | 2 | 1.69E-03 |
| GO:0000902~cell morphogenesis                            | 28 | 3 | 1.76E-03 |
| GO:0035023~regulation of Rho protein signal transduction | 12 | 1 | 2.48E-03 |
| GO:0032989~cellular component morphogenesis              | 30 | 3 | 2.80E-03 |
| GO:0048514~blood vessel morphogenesis                    | 20 | 2 | 2.90E-03 |
| GO:0016311~dephosphorylation                             | 16 | 2 | 2.93E-03 |
| GO:0001568~blood vessel development                      | 23 | 3 | 3.10E-03 |
| GO:0001944~vasculature development                       | 23 | 3 | 4.16E-03 |
| GO:0003012~muscle system process                         | 10 | 1 | 4.30E-03 |
| GO:0032318~regulation of Ras GTPase activity             | 11 | 1 | 4.54E-03 |
| GO:0006816~calcium ion transport                         | 14 | 2 | 4.99E-03 |
| GO:0007264~small GTPase mediated signal transduction     | 23 | 3 | 6.06E-03 |
| GO:0001763~morphogenesis of a branching structure        | 14 | 2 | 6.55E-03 |
| GO:0009719~response to endogenous stimulus               | 18 | 2 | 6.84E-03 |
| GO:0006936~muscle contraction                            | 9  | 1 | 7.26E-03 |
| GO:0006470~protein amino acid dephosphorylation          | 13 | 1 | 8.02E-03 |
| GO:0008016~regulation of heart contraction               | 8  | 1 | 9.03E-03 |

### H3K27ac enriched regions occupied by Gata4 in chambers

| Term                                                              | Count | % | P-value  |
|-------------------------------------------------------------------|-------|---|----------|
| GO:0007517~muscle organ development                               | 43    | 3 | 2.99E-12 |
| GO:0060537~muscle tissue development                              | 35    | 2 | 9.21E-11 |
| GO:0048738~cardiac muscle tissue development                      | 22    | 2 | 1.54E-10 |
| GO:0007507~heart development                                      | 46    | 3 | 2.15E-10 |
| GO:0014706~striated muscle tissue development                     | 33    | 2 | 2.65E-10 |
| GO:0042692~muscle cell differentiation                            | 31    | 2 | 6.06E-10 |
| GO:0051146~striated muscle cell differentiation                   | 24    | 2 | 5.18E-08 |
| GO:0030029~actin filament-based process                           | 34    | 2 | 3.39E-07 |
| GO:0003012~muscle system process                                  | 19    | 1 | 7.81E-07 |
| GO:0010604~positive regulation of macromolecule metabolic process | 80    | 6 | 1.05E-06 |
| GO:0007010~cytoskeleton organization                              | 49    | 3 | 1.74E-06 |
| GO:0030036~actin cytoskeleton organization                        | 31    | 2 | 2.24E-06 |

|                                                                                                         |     |   |          |
|---------------------------------------------------------------------------------------------------------|-----|---|----------|
| GO:0006936~muscle contraction                                                                           | 17  | 1 | 3.55E-06 |
| GO:0055002~striated muscle cell development                                                             | 16  | 1 | 4.10E-06 |
| GO:0055001~muscle cell development                                                                      | 17  | 1 | 4.49E-06 |
| GO:0006793~phosphorus metabolic process                                                                 | 98  | 7 | 7.91E-06 |
| GO:0006796~phosphate metabolic process                                                                  | 98  | 7 | 7.91E-06 |
| GO:0007155~cell adhesion                                                                                | 70  | 5 | 8.62E-06 |
| GO:0022610~biological adhesion                                                                          | 70  | 5 | 9.17E-06 |
| GO:0051254~positive regulation of RNA metabolic process                                                 | 56  | 4 | 1.11E-05 |
| GO:0055007~cardiac muscle cell differentiation                                                          | 11  | 1 | 1.46E-05 |
| GO:0045893~positive regulation of transcription, DNA-dependent                                          | 55  | 4 | 1.83E-05 |
| GO:0051270~regulation of cell motion                                                                    | 22  | 2 | 2.21E-05 |
| GO:0007242~intracellular signaling cascade                                                              | 100 | 7 | 2.67E-05 |
| GO:0001944~vasculature development                                                                      | 37  | 3 | 5.37E-05 |
| GO:0003007~heart morphogenesis                                                                          | 17  | 1 | 6.11E-05 |
| GO:0045935~positive regulation of nucleobase, nucleoside, nucleotide and nucleic acid metabolic process | 62  | 4 | 6.71E-05 |
| GO:0001568~blood vessel development                                                                     | 36  | 3 | 7.36E-05 |
| GO:0035051~cardiac cell differentiation                                                                 | 11  | 1 | 7.41E-05 |
| GO:0051056~regulation of small GTPase mediated signal transduction                                      | 34  | 2 | 9.81E-05 |
| GO:0006357~regulation of transcription from RNA polymerase II promoter                                  | 71  | 5 | 9.93E-05 |
| GO:0045941~positive regulation of transcription                                                         | 58  | 4 | 1.02E-04 |
| GO:0016310~phosphorylation                                                                              | 80  | 6 | 1.04E-04 |
| GO:0007015~actin filament organization                                                                  | 14  | 1 | 1.38E-04 |
| GO:0051173~positive regulation of nitrogen compound metabolic process                                   | 62  | 4 | 1.59E-04 |
| GO:0010927~cellular component assembly involved in morphogenesis                                        | 11  | 1 | 1.67E-04 |
| GO:0010557~positive regulation of macromolecule biosynthetic process                                    | 62  | 4 | 1.94E-04 |
| GO:0010628~positive regulation of gene expression                                                       | 58  | 4 | 2.10E-04 |
| GO:0030239~myofibril assembly                                                                           | 8   | 1 | 2.35E-04 |
| GO:0009891~positive regulation of biosynthetic process                                                  | 64  | 4 | 2.52E-04 |
| GO:0031032~actomyosin structure organization                                                            | 9   | 1 | 2.58E-04 |
| GO:0007167~enzyme linked receptor protein signaling pathway                                             | 37  | 3 | 3.28E-04 |
| GO:0031328~positive regulation of cellular biosynthetic process                                         | 63  | 4 | 3.40E-04 |
| GO:0040029~regulation of gene expression, epigenetic                                                    | 15  | 1 | 4.11E-04 |
| GO:0048514~blood vessel morphogenesis                                                                   | 29  | 2 | 4.73E-04 |

|                                               |    |   |          |
|-----------------------------------------------|----|---|----------|
| GO:0006468~protein amino acid phosphorylation | 70 | 5 | 5.29E-04 |
| GO:0051051~negative regulation of transport   | 15 | 1 | 5.55E-04 |
| GO:0035295~tube development                   | 35 | 2 | 7.17E-04 |
| GO:0008016~regulation of heart contraction    | 12 | 1 | 7.26E-04 |

**Supplementary Table 3:** Biological process terms selected from the 50 most significantly enriched for dynamic H3K27 regions co-occupied by Gata4.

|                |                         |         |
|----------------|-------------------------|---------|
| <b>Bmp2_F</b>  | CGGACTGCGGTCTCCTAA      | RT-qPCR |
| <b>Bmp2_R</b>  | GGGAAGCAGCAACTAGA       | RT-qPCR |
| <b>Gata4_F</b> | GGAAGACACCCCAATCTCG     | RT-qPCR |
| <b>Gata4_R</b> | CATGGCCCCACAATTGAC      | RT-qPCR |
| <b>Gata6_F</b> | GGTCTCTACAGCAAGATGAATGG | RT-qPCR |
| <b>Gata6_R</b> | TGGCACAGGACAGTCCAAG     | RT-qPCR |
| <b>Hdac1_F</b> | TGGTCTCTACCGAAAAATGGAG  | RT-qPCR |
| <b>Hdac1_R</b> | TCATCACTGTGGTACTTGGTCA  | RT-qPCR |
| <b>Hdac2_F</b> | GCTGCTGGACTTACGAAACa    | RT-qPCR |
| <b>Hdac2_R</b> | CTTGAAATCCGGTCCAAAGT    | RT-qPCR |
| <b>Hdac3_F</b> | TTCAACGTGGGTGATGACTG    | RT-qPCR |
| <b>Hdac3_R</b> | TTAGCTGTGTTGCTCCTTGC    | RT-qPCR |
| <b>Hdac4_F</b> | GCAAGATCCTCATTGTAGACTGG | RT-qPCR |
| <b>Hdac4_R</b> | GAACATTGGGGTCATTGTAGAAG | RT-qPCR |
| <b>Hdac5_F</b> | CAGCACCGAGGTAAAGCTG     | RT-qPCR |
| <b>Hdac5_R</b> | GGAACTCTGGTCCAAAGAAGC   | RT-qPCR |
| <b>Hdac6_F</b> | GCCTAGATGTGTCCCAACCT    | RT-qPCR |
| <b>Hdac6_R</b> | CCATATGGGCATTGACATAGC   | RT-qPCR |
| <b>Hdac7_F</b> | GCAGCCCTTGAGAGAACAGT    | RT-qPCR |
| <b>Hdac7_R</b> | TGTCCAAGGGCTCAAGAGTT    | RT-qPCR |
| <b>Hdac8_F</b> | GCAGCTGGCAACTCTGATT     | RT-qPCR |
| <b>Hdac8_R</b> | GTCAAGTATGTCCAGCAACGAG  | RT-qPCR |
| <b>Hdac9_F</b> | TTGCACACAGATGGAGTGG     | RT-qPCR |
| <b>Hdac9_R</b> | GGCCCATAGGAACCTCTGAT    | RT-qPCR |
| <b>Hey1_F</b>  | CATGAAGAGAGCTCACCCAGA   | RT-qPCR |
| <b>Hey1_R</b>  | CGCCGAACCTCAAGTTTCC     | RT-qPCR |
| <b>Hey2_F</b>  | ATTGCAAATGACAGTGGATCAT  | RT-qPCR |
| <b>Hey2_R</b>  | AGCATGGGCATCAAAGTAGC    | RT-qPCR |
| <b>Hprt_F</b>  | TGTTGGATATGCCCTTGACT    | RT-qPCR |
| <b>Hprt_R</b>  | GATTCAACTTGGCTCATCT     | RT-qPCR |
| <b>Nppa_F</b>  | CACAGATCTGATGGATTTCAAG  | RT-qPCR |

|                                                                |                        |           |
|----------------------------------------------------------------|------------------------|-----------|
| <b>Nppa_R</b>                                                  | CCTCATCTTCTACCGGCATC   | RT-qPCR   |
| <b>Nppb_F</b>                                                  | GTCCAGCAGAGACCTCAAAA   | RT-qPCR   |
| <b>Nppb_R</b>                                                  | AGGCAGAGTCAGAACTGGA    | RT-qPCR   |
| <b>Tbx2_F</b>                                                  | TCACTGCCTACCAGAATGACAA | RT-qPCR   |
| <b>Tbx2_R</b>                                                  | GCGTTAGCTGCTTCCTTTTC   | RT-qPCR   |
| <b>Tbx3_F</b>                                                  | GTCGTCACTTTCCACAAACTGA | RT-qPCR   |
| <b>Tbx3_R</b>                                                  | GGACCCAGACTATACTAAACTC | RT-qPCR   |
| <b>Tbx2 (-2700/-2300)_F</b>                                    | ACTCTGCCAGGGGACTC      | ChIP-qPCR |
| <b>Tbx2 (-2700/-2300)_R</b>                                    | GGGTCTACCCCACTCATCT    | ChIP-qPCR |
| <b>cTnI (-230/+126)_F</b>                                      | TGAGAGAAGAGGGACCTTGC   | ChIP-qPCR |
| <b>cTnI (-230/+126)_R</b>                                      | AGCGATAACAGGGTGTGAGG   | ChIP-qPCR |
| <b>Cx30.2 (-2900/-2300)_F</b>                                  | GAGGACAGGGTGCAGACG     | ChIP-qPCR |
| <b>Cx30.2 (-2900/-2300)_R</b>                                  | CCCCACATTCTGAAAACAGG   | ChIP-qPCR |
| <b>ID2 BRE (promoter)_F</b>                                    | ACGCGCGGTAATCAGAAG     | ChIP-qPCR |
| <b>ID2 BRE (promoter)_R</b>                                    | ATCACGCGGGGATAGTAGC    | ChIP-qPCR |
| <b>Nppa (promoter)_F</b>                                       | AACCAGAGTGGCAGAGACAG   | ChIP-qPCR |
| <b>Nppa (promoter)_R</b>                                       | TGATGGAGAAGGAGCCCATGC  | ChIP-qPCR |
| <b>cTnT (promoter)_F</b>                                       | TCTATCTGCCTGAGGCCATT   | ChIP-qPCR |
| <b>cTnT (promoter)_R</b>                                       | ATGAGGCTGGGGTAATGA     | ChIP-qPCR |
| <b>Negative control region 1 (Chr4: 147397477- 147397580)</b>  | TCCAGACACACTGAACAGCAC  | ChIP-qPCR |
| <b>Negative control region 1 (Chr4: 147397477- 147397580)</b>  | TCCCGAGATCAAGTGCTAC    | ChIP-qPCR |
| <b>Negative control region 2 (Chr4: 147397478 - 147397598)</b> | CCAGACACACTGAACAGCAC   | ChIP-qPCR |
| <b>Negative control region 2 (Chr4: 147397478 - 147397598)</b> | TGGCAGCAGGTTCTGGAATC   | ChIP-qPCR |

**Supplementary Table 4: Real time PCR primer sequences.**



## Supplementary References

- 1 He, A., Kong, S. W., Ma, Q. & Pu, W. T. Co-occupancy by multiple cardiac transcription factors identifies transcriptional enhancers active in heart. *Proc Natl Acad Sci U S A* 108, 5632-5637, doi:10.1073/pnas.1016959108 (2011).
- 2 Schlesinger, J. *et al.* The cardiac transcription network modulated by Gata4, Mef2a, Nkx2.5, Srf, histone modifications, and microRNAs. *PLoS genetics* 7, e1001313, doi:10.1371/journal.pgen.1001313 (2011).
- 3 van den Boogaard, M. *et al.* Genetic variation in T-box binding element functionally affects SCN5A/SCN10A enhancer. *J Clin Invest* 122, 2519-2530, doi:10.1172/jci62613 (2012).
- 4 Fei, T. *et al.* Genome-wide mapping of SMAD target genes reveals the role of BMP signaling in embryonic stem cell fate determination. *Genome research* 20, 36-44, doi:10.1101/gr.092114.109 (2010).
- 5 Jonk, L. J., Itoh, S., Heldin, C. H., ten Dijke, P. & Kruijjer, W. Identification and functional characterization of a Smad binding element (SBE) in the JunB promoter that acts as a transforming growth factor-beta, activin, and bone morphogenetic protein-inducible enhancer. *J Biol Chem* 273, 21145-21152 (1998).
- 6 Shi, Y. *et al.* Crystal structure of a Smad MH1 domain bound to DNA: insights on DNA binding in TGF-beta signaling. *Cell* 94, 585-594 (1998).
- 7 Zawel, L. *et al.* Human Smad3 and Smad4 are sequence-specific transcription activators. *Mol Cell* 1, 611-617 (1998).
- 8 Massague, J. & Wotton, D. Transcriptional control by the TGF-beta/Smad signaling system. *EMBO J* 19, 1745-1754, doi:10.1093/emboj/19.8.1745 (2000).
- 9 Korchynskiy, O. & ten Dijke, P. Identification and functional characterization of distinct critically important bone morphogenetic protein-specific response elements in the Id1 promoter. *J Biol Chem* 277, 4883-4891, doi:10.1074/jbc.M111023200 (2002).
- 10 Heisig, J. *et al.* Target gene analysis by microarrays and chromatin immunoprecipitation identifies HEY proteins as highly redundant bHLH repressors. *PLoS genetics* 8, e1002728, doi:10.1371/journal.pgen.1002728 (2012).
- 11 Kadonaga, J. T., Courey, A. J., Ladika, J. & Tjian, R. Distinct regions of Sp1 modulate DNA binding and transcriptional activation. *Science (New York, N.Y.)* 242, 1566-1570 (1988).
- 12 Di Lisi, R. *et al.* Combinatorial cis-acting elements control tissue-specific activation of the cardiac troponin I gene in vitro and in vivo. *J Biol Chem* 273, 25371-25380 (1998).
- 13 Ma, L., Lu, M. F., Schwartz, R. J. & Martin, J. F. Bmp2 is essential for cardiac cushion epithelial-mesenchymal transition and myocardial patterning. *Development* 132, 5601-5611, doi:10.1242/dev.02156 (2005).
- 14 Rutenberg, J. B. *et al.* Developmental patterning of the cardiac atrioventricular canal by Notch and Hairy-related transcription factors. *Development* 133, 4381-4390, doi:10.1242/dev.02607 (2006).
- 15 Singh, R. & Kispert, A. Tbx20, Smads, and the atrioventricular canal. *Trends in cardiovascular medicine* 20, 109-114, doi:10.1016/j.tcm.2010.09.004 (2010).
- 16 Mizuta, E. *et al.* Different distribution of Cav3.2 and Cav3.1 transcripts encoding T-type Ca(2+) channels in the embryonic heart of mice. *Biomedical research (Tokyo, Japan)* 31, 301-305 (2010).
- 17 Marionneau, C. *et al.* Specific pattern of ionic channel gene expression associated with pacemaker activity in the mouse heart. *The Journal of physiology* 562, 223-234, doi:10.1113/jphysiol.2004.074047 (2005).
- 18 Munshi, N. V. *et al.* Cx30.2 enhancer analysis identifies Gata4 as a novel regulator of atrioventricular delay. *Development* 136, 2665-2674, doi:10.1242/dev.038562 (2009).
- 19 Monteiro, R. M. *et al.* Real time monitoring of BMP Smads transcriptional activity during mouse development. *Genesis* 46, 335-346, doi:10.1002/dvg.20402 (2008).
- 20 Jongbloed, M. R. *et al.* Expression of Id2 in the second heart field and cardiac defects in Id2 knock-out mice. *Developmental dynamics : an official publication of the American Association of Anatomists* 240, 2561-2577, doi:10.1002/dvdy.22762 (2011).
- 21 Moskowitz, I. P. *et al.* A molecular pathway including Id2, Tbx5, and Nkx2-5 required for cardiac conduction system development. *Cell* 129, 1365-1376, doi:10.1016/j.cell.2007.04.036 (2007).

- 22 Horsthuis, T. *et al.* Gene expression profiling of the forming atrioventricular node using a novel tbx3-based node-specific transgenic reporter. *Circ Res* 105, 61-69, doi:10.1161/circresaha.108.192443 (2009).
- 23 Boogerd, K. J. *et al.* Msx1 and Msx2 are functional interacting partners of T-box factors in the regulation of Connexin43. *Cardiovasc Res* 78, 485-493, doi:10.1093/cvr/cvn049 (2008).
- 24 Mommersteeg, M. T. *et al.* Slit-roundabout signaling regulates the development of the cardiac systemic venous return and pericardium. *Circ Res* 112, 465-475, doi:10.1161/circresaha.112.277426 (2013).
- 25 Aanhaanen, W. T., Moorman, A. F. & Christoffels, V. M. Origin and development of the atrioventricular myocardial lineage: insight into the development of accessory pathways. *Birth defects research. Part A, Clinical and molecular teratology* 91, 565-577, doi:10.1002/bdra.20826 (2011).
- 26 Whyte, W. A. *et al.* Enhancer decommissioning by LSD1 during embryonic stem cell differentiation. *Nature* 482, 221-225, doi:10.1038/nature10805 (2012).
